# Supplementary material
Source: PubMed Central journal article supplement (PMC7395459)
Supplement: pnas.2001507117.sapp.pdf [file pnas.2001507117.sapp.pdf]

# PNAS

[www.pnas.org](http://www.pnas.org)

Supplementary Information for

## **Ranking essential bacterial processes by speed of mutant death**

Larry A. Gallagher\*, Jeannie Bailey and Colin Manoil

Email: [lg@uw.edu](mailto:lg@uw.edu)

### **This PDF file includes:**

Figures S1 and S2  
Tables S1 to S4

### **Other supplementary materials for this manuscript include the following:**

Dataset S1

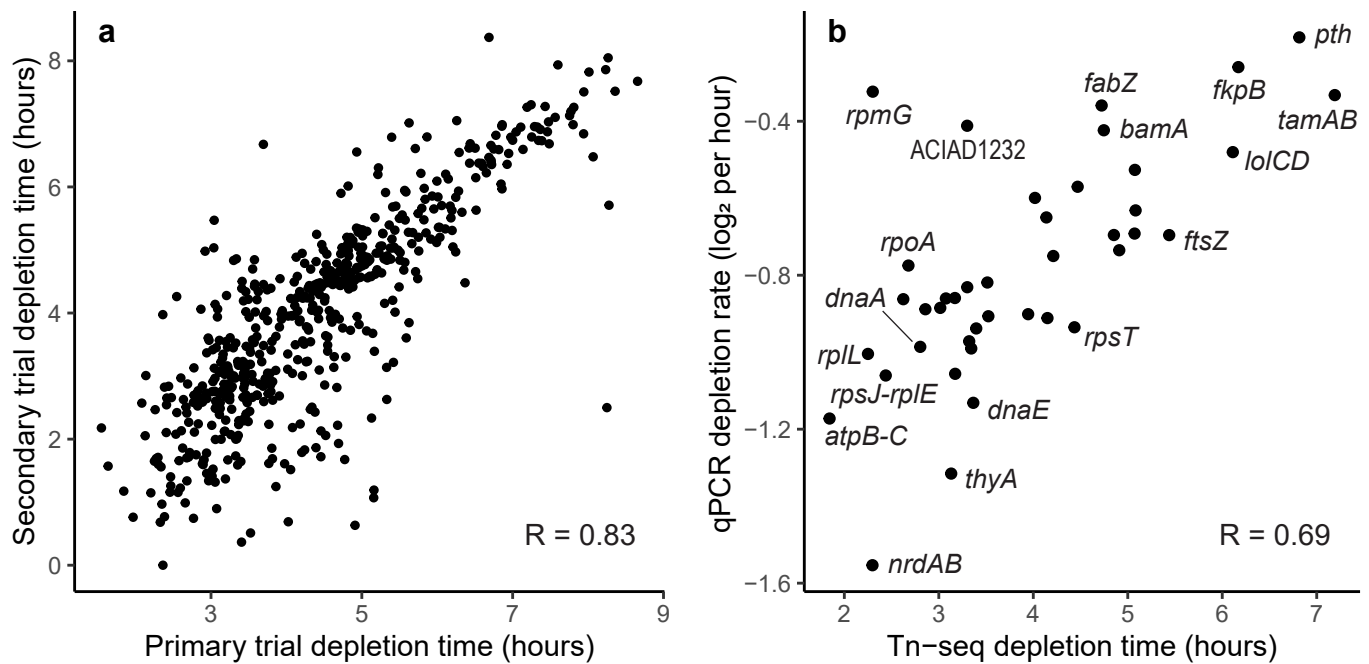

**Figure S1. Verification of essential gene mutant depletion times.** (a) Comparison of the TFNseq two-fold mutant depletion times for the essential genes by two independent transformation and growth trials. R, Pearson's correlation. Most of the prominent outliers correspond to small genes, probably because they were more affected than larger genes by the reduced genome coverage with insertions in the early time points of the secondary trial compared to the primary trial (Table S1). (b) Comparison of TFNseq mutant depletion times with depletion rates determined by qPCR for deletions of 40 essential loci (Methods and Table S4). In cases where multiple genes were deleted (e.g.,  $\Delta nrdAB$ ), the Tn-seq depletion time corresponds to a single representative gene (e.g., *nrdA*) (Table S4). Selected points are labeled with the gene(s) deleted. The TFNseq depletion times were those found in the primary trial.

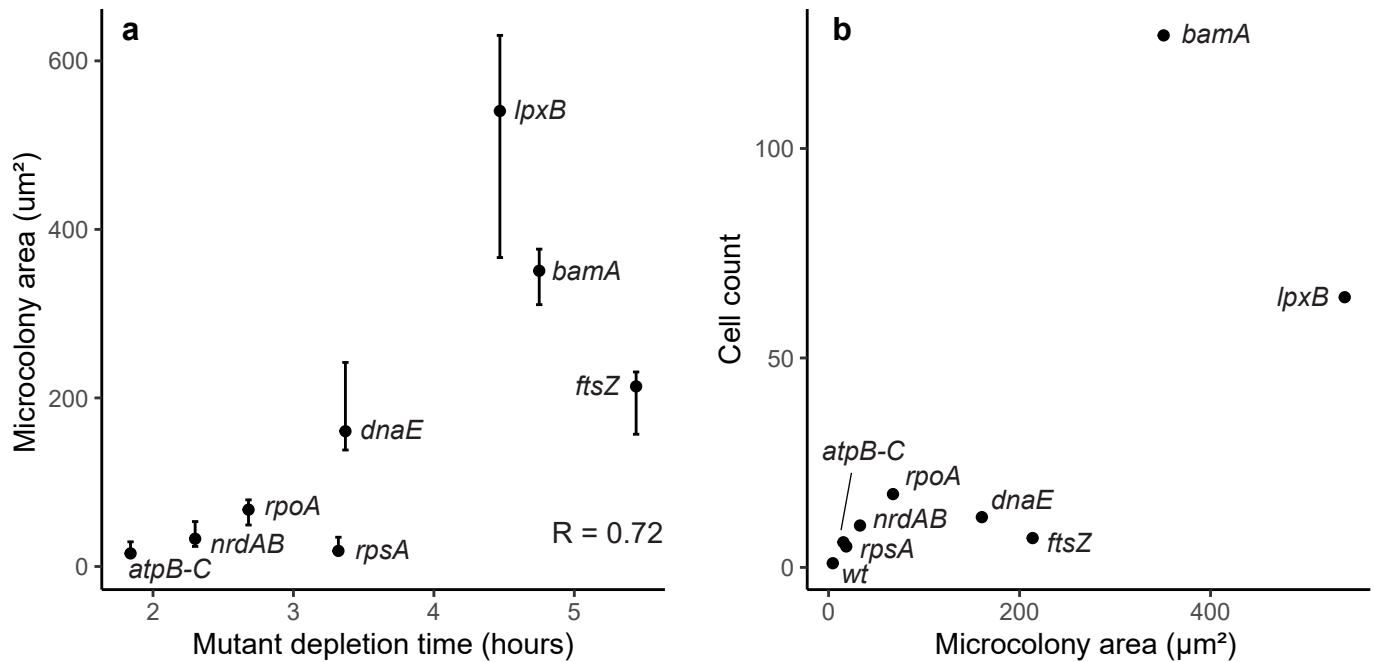

**Figure S2. Mutant microcolony size and cell number.** (a) The median two-dimensional areas of representative deletion mutant microcolonies like those shown in Fig. 5 are plotted against the corresponding TFNseq mutant depletion times. For deletions of multiple genes, the depletion time of the fastest-depleting gene was used. Error bars represent the interquartile range. R, Pearson's correlation. (b) The median cell number per microcolony is plotted against the median microcolony area for the microcolonies analyzed in panel a and for a set of wild type microcolonies. The microcolonies of most mutants appeared to consist predominantly of single layers of cells, with the exception of the *bamA* mutant, which appeared mounded. Microcolony areas were measured by manually tracing colony outlines and calculating the corresponding areas using Photoshop (Adobe) (subtracting the areas of large internal spaces devoid of cells such as are seen for *ftsZ* microcolonies). In cases in which mutant cell morphologies were easily distinguished from wild type, outlines did not include the wild type cells. In cases where mutant and wild type cells morphologies were not distinguishable, all cells were included. These areas (for *atpB-C*, *rpsA* and *rpoA*) thus represent maxima for the corresponding mutants. Cells within each microcolony area were counted manually. The numbers of microcolonies analyzed were: 34 wild type, 23 *atpB-C*, 17 *nrdAB*, 20 *rpoA*, 21 *rpsA*, 10 *dnaE*, 16 *lpxB*, 11 *bamA* and 13 *ftsZ*.

**Table S1. TFNseq sample summary data.**

| Sample                                                                  | Transformants plated at start* | Harvest time (h:min) | Doublings‡ | µg gDNA isolated | µg DNA analyzed by Tn-seq | Sequence reads | Number mapped to ADP1 | Insertion positions identified | Genes without mutants¶ |
|-------------------------------------------------------------------------|--------------------------------|----------------------|------------|------------------|---------------------------|----------------|-----------------------|--------------------------------|------------------------|
| <i>Pre-transformation sample (mutagenized and repaired genomic DNA)</i> |                                |                      |            |                  |                           |                |                       |                                |                        |
| m.r.gDNA                                                                | NA                             | NA                   | NA         | NA               | 1.2                       | 13,172,421     | 1,332,044†            | 649,114                        | (0)                    |
| <i>Primary mutant depletion time-course trial</i>                       |                                |                      |            |                  |                           |                |                       |                                |                        |
| 1°_2h                                                                   | 3.1E+7                         | 2:22                 | 0.5        | 8.9              | 8.3                       | 6,957,278      | 5,152,374             | 974,353                        | 13                     |
| 1°_4h                                                                   | 1.5E+7                         | 4:14                 | 3.4        | 7.4              | 7.1                       | 3,988,772      | 2,758,152             | 329,496                        | 292                    |
| 1°_6h                                                                   | 4.1E+6                         | 6:08                 | 6.6        | 6.5              | 3.5                       | 2,420,406      | 2,077,341             | 424,927                        | 523                    |
| 1°_8h                                                                   | 2.1E+6                         | 8:20                 | 10.0       | 13.2             | 2.8                       | 3,263,096      | 2,924,859             | 495,539                        | 610                    |
| <i>Primary outgrown mutant pool</i>                                     |                                |                      |            |                  |                           |                |                       |                                |                        |
| AyL4                                                                    | 1.4E+6                         | 18:10                | 21.4       | 32.6             | 1.8                       | 18,824,981     | 15,600,537            | 348,758                        | 652                    |
| <i>Secondary mutant depletion time-course trial</i>                     |                                |                      |            |                  |                           |                |                       |                                |                        |
| 2°_2h                                                                   | 1.6E+7                         | 2:16                 | 0.3        | 4.5              | 4.5                       | 13,914,130     | 2,461,365†            | 126,249                        | 307                    |
| 2°_4h                                                                   | 7.5E+6                         | 4:10                 | 3.3        | 3.9              | 2.8                       | 6,993,141      | 3,183,592†            | 181,844                        | 419                    |
| 2°_6h                                                                   | 3.2E+6                         | 6:06                 | 6.3        | 3.6              | 1.6                       | 3,661,566      | 2,794,729             | 384,906                        | 526                    |
| 2°_8h                                                                   | 1.6E+6                         | 8:21                 | 10.3       | 9.3              | 1.5                       | 5,337,350      | 4,264,156             | 467,628                        | 619                    |
| <i>Secondary outgrown mutant pool</i>                                   |                                |                      |            |                  |                           |                |                       |                                |                        |
| AyL3                                                                    | 7.1E+6                         | 18:00                | 15.7       | 24.7             | 0.4                       | 3,714,372      | 2,947,731             | 116,805                        | 689                    |

\* Transformants plated: approximate total number of kanamycin-resistant transformants (representing both nonessential and essential genes) plated and grown, based on total kanamycin-resistant cfu in the plating mixture, corrected for the absence of essential gene cfu (565 of 3207 genes are essential, so approximately 82% of transformants would form colonies).

‡ Doublings based on nonessential transposon mutant titer relative to initial titer.

† Many others mapped to T33.

¶ Number of genes depleted at least two-fold relative to the pre-transformation sample.

NA, not applicable.

**Table S2. Genes and depletion times for essential processes.**

| Process                 | Central essential genes                                                                                                                                                                                                                                                                                                       | Other associated genes (including <i>non-essentials</i> )                                                                                                                                                                                                     | Gene depletion times* |           |           |
|-------------------------|-------------------------------------------------------------------------------------------------------------------------------------------------------------------------------------------------------------------------------------------------------------------------------------------------------------------------------|---------------------------------------------------------------------------------------------------------------------------------------------------------------------------------------------------------------------------------------------------------------|-----------------------|-----------|-----------|
|                         |                                                                                                                                                                                                                                                                                                                               |                                                                                                                                                                                                                                                               | Median                | IQR       | Range     |
| ATP synthase            | atpA, atpB, atpC, atpD, atpE, atpF, atpG, atpH                                                                                                                                                                                                                                                                                | adk, atpI, gmk, <i>ndk</i>                                                                                                                                                                                                                                    | <b>2.3</b>            | 2.2 - 2.5 | 1.8 - 2.6 |
| dNTP synthesis          | nrdA, nrdB, thyA                                                                                                                                                                                                                                                                                                              | dut, <i>nrdR</i> , tmk                                                                                                                                                                                                                                        | <b>2.5</b>            | 2.4 - 2.8 | 2.3 - 3.1 |
| Cytochrome oxidase      | cyoA, cyoB, cyoC, cyoD, cyoE                                                                                                                                                                                                                                                                                                  | -                                                                                                                                                                                                                                                             | <b>2.7</b>            | 2.6 - 2.8 | 2.5 - 4.1 |
| Other energy production | -                                                                                                                                                                                                                                                                                                                             | <i>cioA</i> , <i>cioB</i> , <i>cydB</i> , etfA, etfB, <i>etfD</i> , etfD, ppa, <i>ybgT</i>                                                                                                                                                                    | -                     | -         | -         |
| Ribosomal proteins      | rplA, rplB, rplC, rplD, rplE, rplF, rplJ, rplK, rplL, rplM, rplN, rplO, rplP, rplQ, rplR, rplS, rplT, rplU, rplV, rplW, rplX, rplY, rpmA, rpmB, rpmC, rpmD, rpmE1, rpmF, rpmG, rpmH, rpmI, rpmJ, rpsA, rpsB, rpsC, rpsD, rpsE, rpsF, rpsG, rpsH, rpsI, rpsJ, rpsK, rpsL, rpsM, rpsN, rpsO, rpsP, rpsQ, rpsR, rpsS, rpsT, rpsU | <i>prmA1</i> , <i>prmA2</i> , <i>prmB</i> , <i>rplI</i> , <i>rpmE2</i>                                                                                                                                                                                        | <b>2.9</b>            | 2.4 - 3.4 | 1.5 - 5.2 |
| NADH dehydrogenase      | nuoA, nuoB, nuoCD, nuoE, nuoF, nuoG, nuoH, nuoI, nuoJ, nuoK, nuoL, nuoM, nuoN                                                                                                                                                                                                                                                 | -                                                                                                                                                                                                                                                             | <b>3.2</b>            | 3 - 3.3   | 2.9 - 3.5 |
| Pentose Phos. Shunt     | rpe, rpiA, tkt                                                                                                                                                                                                                                                                                                                | <i>tal</i>                                                                                                                                                                                                                                                    | <b>3.2</b>            | 3.1 - 4   | 3 - 4.8   |
| Histidine synthesis     | hisA, hisB, hisC, hisD, hisF, hisG, hisH, hisI, hisZ                                                                                                                                                                                                                                                                          | -                                                                                                                                                                                                                                                             | <b>3.2</b>            | 3.2 - 3.5 | 3 - 4.3   |
| Pyrimidine synthesis    | cmk, pyrB, pyrC, pyrD, pyrE, pyrF, pyrG, pyrH, pyrX                                                                                                                                                                                                                                                                           | carA, carB, <i>ndk</i>                                                                                                                                                                                                                                        | <b>3.2</b>            | 3.1 - 4.1 | 2.3 - 4.2 |
| AA-tRNA Synthetases     | alaS, argS, aspS, cysS, gltX, glyQ, glyS, hisS, ileS, leuS, lysS, metG, pheS, pheT, proS, serS, thrS, trpS, tyrS, valS                                                                                                                                                                                                        | <i>ACIAD0272</i> , <i>glnS</i> , <i>tilS</i>                                                                                                                                                                                                                  | <b>3.3</b>            | 3.2 - 3.5 | 2.9 - 4.4 |
| Fe-S cluster synthesis  | ACIAD0010, hscA, hscB, iscA, iscS, iscU                                                                                                                                                                                                                                                                                       | iscR                                                                                                                                                                                                                                                          | <b>3.4</b>            | 3.1 - 3.9 | 2.4 - 4.3 |
| Ile, Leu, Val synthesis | ilvA1, ilvB, ilvC, ilvD, ilvE, ilvN, leuA, leuB, leuC, leuD                                                                                                                                                                                                                                                                   | -                                                                                                                                                                                                                                                             | <b>3.4</b>            | 3.1 - 3.7 | 2.9 - 4.5 |
| Tryptophan synthesis    | aroB, aroC, aroE, aroK, aroQ, trpA, trpB1, trpC, trpD, trpE, trpF, trpG                                                                                                                                                                                                                                                       | <i>aroD</i>                                                                                                                                                                                                                                                   | <b>3.4</b>            | 3.2 - 4.2 | 2.8 - 4.9 |
| Purine synthesis        | guaA, guaB, purA, purB, purC, purD, purE, purF, purH, purK, purL, purM                                                                                                                                                                                                                                                        | adk, gmk, <i>ndk</i> , prs, <i>purN</i> , <i>purT</i> , purU                                                                                                                                                                                                  | <b>3.4</b>            | 3.1 - 3.8 | 2.8 - 3.9 |
| Other AA synthesis      | ACIAD2222, asd, <i>glnA</i> , <i>gltB</i> , <i>gltD</i> , <i>glyA</i> , hom, lysA, lysC, pheA, proA, proB, proC, serA, serB, serC, thrC                                                                                                                                                                                       | ACIAD2087, <i>araT</i> , <i>aspC</i> , carA, carB, <i>cysA</i> , cysD, <i>cysE</i> , cysH, cysI, <i>cysK</i> , <i>cysM</i> , cysN, <i>cysP</i> , <i>cysQ</i> , <i>cysT</i> , <i>cysW</i> , <i>lysP</i> , <i>quiA</i> , <i>quiC</i> , <i>sbp</i> , <i>thrH</i> | <b>3.5</b>            | 3.2 - 4.2 | 3 - 5.5   |
| Redox factors           | ACIAD0747, ACIAD1232, ACIAD2244, ACIAD2892, fdx, fdxA, trxA, trxB                                                                                                                                                                                                                                                             | <i>ahpC1</i> , <i>ahpC2</i> , <i>grxC</i> , <i>rubA</i> , <i>rubB</i> , <i>trxC</i>                                                                                                                                                                           | <b>3.6</b>            | 3 - 4.2   | 2.7 - 6.1 |
| DNA replication         | dnaE, dnaN, dnaX, holA, holB, hold, rnhA-dnaQ                                                                                                                                                                                                                                                                                 | ACIAD0352, dnaA, dnaB, dnaG, gyrA, gyrB, <i>holC</i> , hup, ligA, parC, parE, polA, rep, <i>rnhB</i> , <i>ruvA</i> , <i>ruvB</i> , <i>ruvC</i> , ssb, topA                                                                                                    | <b>3.7</b>            | 3.5 - 4.4 | 3.1 - 5.1 |
| TCA Cycle               | aceE, aceF, acnB, fumA, <i>gltA</i> , <i>idh</i> , mdh, sdhA, sdhB, sdhC, sdhD, sucA, sucB                                                                                                                                                                                                                                    | ACIAD3189, <i>icd</i> , <i>lpdA1</i> , <i>sucC</i> , <i>sucD</i>                                                                                                                                                                                              | <b>3.7</b>            | 2.7 - 4   | 2.6 - 5   |
| Gluconeogenesis         | ACIAD2287, eno, epd, fba, fbp1, gap, gpmI, pckG, pgk, ppsA, sfcA, tpiA                                                                                                                                                                                                                                                        | <i>mgo</i> , <i>pgi</i> , <i>ppc</i>                                                                                                                                                                                                                          | <b>3.7</b>            | 3 - 5     | 2.4 - 6.2 |
| Isoprenoid synthesis    | dxr, dxs, ispA, ispB, ispD, ispE, ispF, ispG, ispH, uppS                                                                                                                                                                                                                                                                      | ACIAD1128, ACIAD2405, ubiA, <i>ubiB</i> , <i>ubiC</i> , ubiE, ubiG, ubiH                                                                                                                                                                                      | <b>4.1</b>            | 3.7 - 4.5 | 3.4 - 6.7 |
| Protein secretion       | ffh, ftsY, lepB, oxaA, secA, secD, secE, secF, secY                                                                                                                                                                                                                                                                           | <i>secB</i> , <i>secG</i> , <i>yajC</i>                                                                                                                                                                                                                       | <b>4.2</b>            | 3.9 - 4.8 | 2.4 - 5.4 |
| Arginine synthesis      | argA, argB, argC, argD, argF, argG, argH, argI                                                                                                                                                                                                                                                                                | <i>argE</i>                                                                                                                                                                                                                                                   | <b>4.2</b>            | 3.9 - 4.5 | 3.2 - 5.8 |
| Translation factors     | efp, frr, fusA, infA, infB, infC, prfA, prfB, tsf                                                                                                                                                                                                                                                                             | ACIAD0208, ACIAD0367, ACIAD0565, ACIAD2561, <i>ACIAD2666</i> , ACIAD3160, engC, era, <i>pcnB</i> , pth, rimM, rnc, rne, rrmJ, smpB, <i>tuf</i> , <i>tuf2</i>                                                                                                  | <b>4.3</b>            | 3.4 - 5.5 | 3 - 6     |
| Methionine synthesis    | metE, metX, metZ                                                                                                                                                                                                                                                                                                              | ACIAD3222, ACIAD3524, <i>metH</i> , metK, metW, <i>metY</i>                                                                                                                                                                                                   | <b>4.3</b>            | 3.9 - 4.7 | 3.4 - 5.1 |
| Transcription           | rpoA, rpoB, rpoC, rpoD                                                                                                                                                                                                                                                                                                        | ACIAD2373, <i>greA</i> , <i>greB</i> , <i>mfd</i> , nusA, nusB, nusG, rho, rpoH, rpoN, <i>rpoZ</i>                                                                                                                                                            | <b>4.4</b>            | 4 - 4.5   | 2.7 - 4.5 |
| Riboflavin synthesis    | ribA, ribD, ribE, ribF, ribH                                                                                                                                                                                                                                                                                                  | <i>ribB1</i> , <i>ribB2</i>                                                                                                                                                                                                                                   | <b>4.5</b>            | 4.2 - 4.8 | 3.5 - 5.7 |
| tRNA modification       | ACIAD1312, ACIAD1895, ACIAD2376, cca, fmt, gatA, gatB, gatC, sirA, trmD, trmU, tusD                                                                                                                                                                                                                                           | <i>sirB</i>                                                                                                                                                                                                                                                   | <b>4.6</b>            | 4.2 - 5.4 | 3.2 - 6.5 |

| Process                | Central essential genes                                                                                                                                                                                                                                                           | Other associated genes (including <a href="#">non-essentials</a> )                                                                                                                                                                                                                                                               | Gene depletion times* |           |           |
|------------------------|-----------------------------------------------------------------------------------------------------------------------------------------------------------------------------------------------------------------------------------------------------------------------------------|----------------------------------------------------------------------------------------------------------------------------------------------------------------------------------------------------------------------------------------------------------------------------------------------------------------------------------|-----------------------|-----------|-----------|
|                        |                                                                                                                                                                                                                                                                                   |                                                                                                                                                                                                                                                                                                                                  | Median                | IQR       | Range     |
| LPS synthesis          | fabZ, kdsA, kdsB, kdsC, kdsD, kdtA, lpxA, lpxB, lpxC, lpxD, lpxH, lpxK, lpxL?                                                                                                                                                                                                     | ACIAD0072, ACIAD0073, ACIAD0074, ACIAD0075, ACIAD0081, ACIAD0086, ACIAD1383, glmM, glmS, glmU, lpxL, lpxO                                                                                                                                                                                                                        | <b>4.7</b>            | 4.2 - 5   | 3.4 - 6.1 |
| Nicotinamide synthesis | nadA, nadB, nadC, nadE, nadF                                                                                                                                                                                                                                                      | ACIAD2606                                                                                                                                                                                                                                                                                                                        | <b>4.7</b>            | 4.5 - 5   | 4.4 - 5.9 |
| General regulators     | ACIAD0727, ACIAD3019, ACIAD3020, fur, glnK, ihfA, ihfB, ntrC, ompR, rpoH, rpoN, spoT                                                                                                                                                                                              | <a href="#">ACIAD0726</a> , ACIAD0746, ACIAD0985, ACIAD1082, <a href="#">ACIAD1469</a> , <a href="#">ACIAD1519</a> , <a href="#">ACIAD1624</a> , ACIAD1802, <a href="#">ACIAD2627</a> , ACIAD2986, cbl, dctA3, <a href="#">envZ</a> , estR, fis, metR, <a href="#">mlaB</a> , <a href="#">ntrB</a> , <a href="#">relA</a> , typA | <b>4.8</b>            | 4.4 - 5.2 | 3.6 - 6.8 |
| Chaperones             | def1, dnaK, ftsH, groL, groS, grpE                                                                                                                                                                                                                                                | <a href="#">dksA</a> , <a href="#">dnaJ</a> , <a href="#">dsbA</a> , <a href="#">dsbB</a> , <a href="#">fkpB</a> , <a href="#">glnD</a>                                                                                                                                                                                          | <b>4.8</b>            | 4.6 - 5.6 | 4.2 - 8.1 |
| Fatty acid synthesis   | accA, accB, accC, accD, acpP, fabB, fabD, fabG, fabI                                                                                                                                                                                                                              | ACIAD0585                                                                                                                                                                                                                                                                                                                        | <b>4.8</b>            | 4.6 - 5.1 | 4.5 - 5.3 |
| Sodium efflux          | phaAB, phaC, phaD, phaE, phaF, phaG                                                                                                                                                                                                                                               | -                                                                                                                                                                                                                                                                                                                                | <b>4.9</b>            | 4.8 - 4.9 | 4.7 - 5.1 |
| Heme synthesis         | hemA, hemB, hemC, hemD, hemE, hemF, hemH, hemL                                                                                                                                                                                                                                    | cobA                                                                                                                                                                                                                                                                                                                             | <b>4.9</b>            | 3.9 - 5.5 | 3.4 - 6   |
| LPS transport          | lptA, lptB, lptC, lptD, lptF, lptG                                                                                                                                                                                                                                                | <a href="#">lptE</a> , msbA                                                                                                                                                                                                                                                                                                      | <b>4.9</b>            | 4.6 - 5   | 4.3 - 5.2 |
| Phospholipid synthesis | cdsA, gpsA, pgsA, plsB, psd, pssA                                                                                                                                                                                                                                                 | <a href="#">pgpA</a>                                                                                                                                                                                                                                                                                                             | <b>5.0</b>            | 4 - 5.4   | 3.4 - 7.4 |
| PG synthesis           | ddlB, mraY, murA, murB, murC, murD, murE, murF, murG, murI2, mviN                                                                                                                                                                                                                 | dapA, dapB, dapD, dapE, dapF, glmM, glmS, glmU, <a href="#">pbpG</a>                                                                                                                                                                                                                                                             | <b>5.0</b>            | 4.7 - 5.1 | 4.2 - 5.8 |
| Unknown function       | ACIAD0041, ACIAD0169, ACIAD0383, ACIAD0508, ACIAD0598, ACIAD0645, ACIAD0659, ACIAD0714, ACIAD0868, ACIAD0878, ACIAD0907, ACIAD0941, ACIAD0944, ACIAD1893, ACIAD1894, ACIAD2010, ACIAD2193, ACIAD2230, ACIAD2926, ACIAD2981, ACIAD3039, ACIAD3280, ACIAD3327, ACIAD3524, ACIAD3568 | -                                                                                                                                                                                                                                                                                                                                | <b>5.3</b>            | 3.8 - 6.9 | 2.8 - 8.3 |
| Biotin synthesis       | (bioH), ACIAD0841, bioA, bioB, bioC, bioD, bioF                                                                                                                                                                                                                                   | -                                                                                                                                                                                                                                                                                                                                | <b>5.5</b>            | 5.2 - 5.8 | 3.5 - 6.4 |
| CRISPR                 | ACIAD2480, ACIAD2481, ACIAD2482, ACIAD2483                                                                                                                                                                                                                                        | <a href="#">ACIAD2477</a> , <a href="#">ACIAD2484</a>                                                                                                                                                                                                                                                                            | <b>5.5</b>            | 5.2 - 5.8 | 4.7 - 6.4 |
| Thiamine synthesis     | thiC, thiD, thiE, thiG, thiL, thiS                                                                                                                                                                                                                                                | engC, <a href="#">thiM</a>                                                                                                                                                                                                                                                                                                       | <b>5.5</b>            | 4.9 - 6   | 4.7 - 6.8 |
| Folate synthesis       | ACIAD2407, folA, folB, folC, folD, folE, folK, folP                                                                                                                                                                                                                               | <a href="#">metF</a> , <a href="#">pabB</a> , <a href="#">pabC</a>                                                                                                                                                                                                                                                               | <b>5.9</b>            | 5.1 - 6.6 | 3.5 - 7.1 |
| Coenzyme A synthesis   | coaBC, coaD, coaE, coaX, panB, panC, panD                                                                                                                                                                                                                                         | -                                                                                                                                                                                                                                                                                                                                | <b>6.2</b>            | 5.9 - 6.5 | 5 - 6.7   |
| Pyridoxine synthesis   | pdxA, pdxB, pdxH, pdxJ                                                                                                                                                                                                                                                            | -                                                                                                                                                                                                                                                                                                                                | <b>6.3</b>            | 4.9 - 7.6 | 4.5 - 7.8 |
| Lipoprotein production | lgt, lnt, lolA, lolC, lolD, lspA                                                                                                                                                                                                                                                  | <a href="#">lolB</a>                                                                                                                                                                                                                                                                                                             | <b>6.3</b>            | 5.2 - 6.8 | 4.8 - 8.2 |
| OMP localization       | bamA, bamD, tamA, tamB                                                                                                                                                                                                                                                            | -                                                                                                                                                                                                                                                                                                                                | <b>6.9</b>            | 6.1 - 7.5 | 4.7 - 8.3 |
| Cell division          | ftsA, ftsI, ftsK, ftsL, ftsN, ftsQ, ftsW, ftsZ                                                                                                                                                                                                                                    | ACIAD0772, ftsB?, ispZ, <a href="#">minC</a> , <a href="#">minD</a> , minE, <a href="#">mrdA</a> , <a href="#">mrdB</a> , <a href="#">mreB</a> , <a href="#">mreC</a> , <a href="#">mreD</a> , rlpA, <a href="#">zapA</a> , <a href="#">zipA</a>                                                                                 | <b>6.9</b>            | 6.3 - 7.4 | 5.4 - 7.9 |

\*The values shown for depletion times (median, IQR and range) were calculated from the central essential genes listed per process. The depletion time per gene represents the interpolated time of two-fold mutant depletion by Tn-seq relative to its representations in in-vitro-mutagenized genomic DNA during selective growth of bacteria after transformation within in-vitro-mutagenized genomic DNA.

**Table S3. Essential metabolic reactions predicted to show high flux.**

The twelve essential reactions exhibiting the highest flux in the metabolic model for *A. baylyi* ADP1 (1) are shown in decreasing order of flux rate, with the corresponding depletion times and ranks (Dataset S1). For enzymes with multiple subunits encoded by more than one gene, the shortest depletion time is given. Note that the ACIAD2287 product is annotated to be bifunctional.

| Reaction                           | Process                | ACIAD locus      | Flux* | Depletion |               |
|------------------------------------|------------------------|------------------|-------|-----------|---------------|
|                                    |                        |                  |       | Time (h)  | Rank (of 565) |
| ATP synthase                       | Energy production      | 0178-0188        | 999   | 1.84      | 3             |
| Fumarate hydratase                 | TCA cycle              | 0538             | 583   | 4.98      | 395           |
| Succinate dehydrogenase            | TCA cycle              | 2879-2882        | 573   | 2.63      | 38            |
| Succinate transport                | Transport              | 2227             | 573   | 4.08      | 255           |
| Cytochrome oxidase                 | Respiration            | 2425-2428        | 571   | 2.53      | 29            |
| Malate dehydrogenase (NADP)        | Other                  | 2287             | 469   | 3.64      | 210           |
| Pyruvate dehydrogenase             | Glycolysis             | 3506, 3507, 2874 | 426   | 3.73      | 220           |
| Glycerol-3-phosphate dehydrogenase | Phospholipid synthesis | 1317             | 300   | 4.94      | 387           |
| Phosphate acetyltransferase        | Other                  | 2287             | 283   | 3.64      | 210           |
| Malate dehydrogenase (NAD)         | TCA cycle              | 3155             | 156   | 4.17      | 266           |
| Inorganic pyrophosphatase          | Other                  | 0239             | 115   | 3.70      | 216           |
| Adenylate kinase                   | Energy production      | 1105             | 102   | 2.56      | 32            |

\* Flux (mmoles per gram dry cell weight per hour) was calculated by optimizing the default ADP1 metabolic model (Ref. 1 and [https://github.com/opencobra/m\\_model\\_collection/blob/master/sbml3/iAbaylyiV4.xml](https://github.com/opencobra/m_model_collection/blob/master/sbml3/iAbaylyiV4.xml)) under the Succinate/Ammonia medium condition using COBRApy (<https://opencobra.github.io/cobrapy/>).

**Reference**

1. Durot M, et al. (2008) Iterative reconstruction of a global metabolic model of *Acinetobacter baylyi* ADP1 using high-throughput growth phenotype and gene essentiality data. *BMC Syst Biol* 2:85.

**Table S4. Targeted deletions analyzed by qPCR.**

| Deletion ID | Gene(s) targeted | (Loci)         | Del coordinates (bp)* |           | qPCR depletion rate (log <sub>2</sub> / hr)* | Representative gene | Depletion time (h)‡ |
|-------------|------------------|----------------|-----------------------|-----------|----------------------------------------------|---------------------|---------------------|
|             |                  |                | From                  | To        |                                              |                     |                     |
| d101        | <i>rplL</i>      | ACIAD0306      | 301,788               | 302,143   | -1.00                                        | <i>rplL</i>         | 2.25                |
| d102        | <i>rpmG</i>      | ACIAD0501      | 494,202               | 494,087   | -0.32                                        | <i>rpmG</i>         | 2.30                |
| d103        | <i>rpsT</i>      | ACIAD1389      | 1,384,927             | 1,384,705 | -0.94                                        | <i>rpsT</i>         | 4.44                |
| d104        | <i>aspS</i>      | ACIAD0609      | 599,060               | 597,301   | -0.99                                        | <i>aspS</i>         | 3.34                |
| d105        | <i>glnS</i>      | ACIAD1920      | 1,912,092             | 1,910,448 | -0.94                                        | <i>glnS</i>         | 3.40                |
| d106        | <i>rpsJ-rplE</i> | ACIAD3220-07   | 3,135,082             | 3,128,718 | -1.06                                        | <i>rpsC</i>         | 2.44                |
| d107        | <i>pth</i>       | ACIAD2909      | 2,845,827             | 2,846,385 | -0.18                                        | <i>pth</i>          | 6.82                |
| d109        | <i>dnaA</i>      | ACIAD0001      | 206                   | 1,592     | -0.99                                        | <i>dnaA</i>         | 2.80                |
| d110        | <i>dnaE</i>      | ACIAD2089      | 2,072,314             | 2,075,862 | -1.13                                        | <i>dnaE</i>         | 3.37                |
| d111        | <i>nrdAB</i>     | ACIAD0724-2    | 710,274               | 705,859   | -1.55                                        | <i>nrdA</i>         | 2.30                |
| d112        | <i>thyA</i>      | ACIAD0515      | 503,742               | 502,943   | -1.32                                        | <i>thyA</i>         | 3.13                |
| d113        | <i>pyrBX</i>     | ACIAD1270-1    | 1,270,637             | 1,272,840 | -0.89                                        | <i>pyrB</i>         | 2.86                |
| d114        | <i>pyrC</i>      | ACIAD1150      | 1,141,940             | 1,140,914 | -0.65                                        | <i>pyrC</i>         | 4.14                |
| d115        | <i>gltA</i>      | ACIAD2886      | 2,825,327             | 2,826,561 | -0.60                                        | <i>gltA</i>         | 4.02                |
| d116        | <i>atpB-C</i>    | ACIAD0180-8    | 179,051               | 185,716   | -1.17                                        | <i>atpB</i>         | 1.84                |
| d118        | <i>cyoA-E</i>    | ACIAD2425-9    | 2,391,462             | 2,396,317 | -0.86                                        | <i>cyoB</i>         | 2.62                |
| d119        | <i>fabI</i>      | ACIAD3116      | 3,047,119             | 3,046,356 | -0.53                                        | <i>fabI</i>         | 5.08                |
| d120        | <i>fabZ</i>      | ACIAD1381      | 1,377,591             | 1,378,064 | -0.36                                        | <i>fabZ</i>         | 4.72                |
| d121        | <i>plsB</i>      | ACIAD3232      | 3,146,192             | 3,148,716 | -0.63                                        | <i>plsB</i>         | 5.08                |
| d122        | <i>mraY</i>      | ACIAD3363      | 3,272,225             | 3,271,112 | -0.69                                        | <i>mraY</i>         | 5.07                |
| d123        | <i>lpxB</i>      | ACIAD2324      | 2,287,784             | 2,286,633 | -0.57                                        | <i>lpxB</i>         | 4.47                |
| d124        | <i>lolCD</i>     | ACIAD2641-0    | 2,596,525             | 2,594,708 | -0.48                                        | <i>lolD</i>         | 6.11                |
| d125        | <i>bamA</i>      | ACIAD1378      | 1,373,490             | 1,375,898 | -0.42                                        | <i>bamA</i>         | 4.75                |
| d126        | <i>tamAB</i>     | ACIAD2403-2    | 2,365,643             | 2,358,438 | -0.33                                        | <i>tamB</i>         | 7.19                |
| d127        | <i>ftsZ</i>      | ACIAD3511      | 3,440,129             | 3,438,965 | -0.70                                        | <i>ftsZ</i>         | 5.44                |
| d128        | <i>secA</i>      | ACIAD0648      | 636,816               | 639,526   | -0.91                                        | <i>secA</i>         | 4.15                |
| d129        | <i>ffh</i>       | ACIAD0839      | 826,407               | 827,805   | -0.90                                        | <i>ffh</i>          | 3.95                |
| d130        | <i>ftsY</i>      | ACIAD2296      | 2,268,235             | 2,267,155 | -0.83                                        | <i>ftsY</i>         | 3.30                |
| d131        | <i>iscS-hscA</i> | ACIAD1404-1399 | 1,399,211             | 1,394,724 | -1.06                                        | <i>hscA</i>         | 3.17                |
| d132        | <i>fkpB</i>      | ACIAD0020      | 26,234                | 25,761    | -0.26                                        | <i>fkpB</i>         | 6.17                |
| d133        | -                | ACIAD1232      | 1,233,154             | 1,233,456 | -0.41                                        | ACIAD1232           | 3.30                |
| d134        | <i>groSL</i>     | ACIAD2839-8    | 2,777,281             | 2,775,325 | -0.70                                        | <i>groL</i>         | 4.85                |
| d135        | <i>ftsH</i>      | ACIAD2853      | 2,791,719             | 2,789,836 | -0.75                                        | <i>ftsH</i>         | 4.21                |
| d136        | -                | ACIAD0878      | 861,463               | 861,017   | -0.74                                        | ACIAD0878           | 4.91                |
| d137        | <i>etfBA</i>     | ACIAD2655-4    | 2,611,316             | 2,609,666 | -0.86                                        | <i>etfA</i>         | 3.17                |
| d138        | -                | ACIAD3524      | 3,452,832             | 3,451,902 | -0.82                                        | ACIAD3524           | 3.51                |
| d139        | -                | ACIAD2244      | 2,214,833             | 2,215,580 | -0.88                                        | ACIAD2244           | 3.02                |
| d140        | -                | ACIAD2981      | 2,910,152             | 2,909,679 | -0.86                                        | ACIAD2981           | 3.08                |
| d142        | -                | ACIAD2153-1    | 2,136,777             | 2,132,849 | -0.26                                        | ACIAD2153           | (non ess)           |
| d143        | -                | ACIAD2802-2799 | 2,748,143             | 2,745,775 | 0 (reference)                                | ACIAD2799           | (non ess)           |
| d145        | <i>rplS</i>      | ACIAD3310      | 3,217,401             | 3,217,058 | -0.91                                        | <i>rplS</i>         | 3.52                |
| d147        | <i>rpoA</i>      | ACIAD3194      | 3,122,923             | 3,121,922 | -0.77                                        | <i>rpoA</i>         | 2.68                |
| d148        | <i>rpsA</i>      | ACIAD2347      | 2,310,668             | 2,309,024 | -0.97                                        | <i>rpsA</i>         | 3.32                |

\* The sequences of the primers used for amplification of the target flanking sequences and for deletion detection by qPCR are available upon request.

‡ TFNseq depletion times were those found in the primary trial.
